# Supplementary material for: Sustainable release of LiNO3 in carbonate electrolytes for stable lithium metal anodes
Source: Royal Society of Chemistry journal article supplement (doi:10.1039/d3cc05859j), 2024-01-01
Supplement: d3cc05859j1.pdf [file d3cc05859j1.pdf]

## Supporting Information

### Sustainable release of $\text{LiNO}_3$ in carbonate electrolytes for stable lithium metal anodes

Siyu Li,<sup>a, ‡</sup> Yuhang Liu,<sup>a, ‡</sup> Ke Wang,<sup>a, ‡</sup> Xiaoqi Hu,<sup>a</sup> Wanqing Guan,<sup>a</sup> Zhuzhu Du,<sup>a</sup> Hongfang Du<sup>b, c</sup> and Wei Ai<sup>a, c\*</sup>

<sup>a</sup> Shaanxi Institute of Flexible Electronics, Northwestern Polytechnical University, Xi'an 710072, China. [iamwai@nwpu.edu.cn](mailto:iamwai@nwpu.edu.cn)

<sup>b</sup> Fujian Cross Strait Institute of Flexible Electronics (Future Technologies), Fujian Normal University, Fuzhou 350117, China.

<sup>c</sup> Research & Development Institute of Northwestern Polytechnical University in Shenzhen, Shenzhen 518057, China.

#### 1. Experimental Section

##### 1.1 Fabrication of PAN/LNO/PP separator

PAN/LNO nanofibers were fabricated using electrospinning. Specifically, 0.41 g of PAN was dissolved in 5 mL of N,N-dimethylformamide to create the precursor solution. Separately, 0.5 g of LNO was combined with 5 mL of the above solution to produce a slurry, which was then electrospun to obtain PAN/LNO/PP. During electrospinning, a high voltage of 15 kV was applied between a needle and a PP separator situated on a rotating drum (rotation speed: 500 rpm; distance: 16 cm), with a solution injection rate of 1 mL h<sup>-1</sup>. To mitigate the potential impact of H<sub>2</sub>O on LNO stability, the ambient humidity was lowered to below 30% using a dehumidifier prior to spinning. Subsequently, the PAN/LNO/PP separator was dried at 60 °C for 12 h in a vacuum. It was then sectioned into 18 mm diameter pieces, ready for cell assembly. The areal mass loading of LNO inside a coin cell is ~1.44 mg.

##### 1.2 Material characterizations

SEM images were collected using a scanning electron microscopy (Verios G4) at

an accelerating voltage of 3 kV. XRD patterns were measured on a Bruker D8 advance diffractometer with Cu K $\alpha$  radiation. Contact angles were obtained using a drop shape analyzer system (DSA1005). XPS characterization was conducted on a Kratos AXIS Ultra DLD with Al (K $\alpha$ ) source and argon ion sputter gun. The binding energy values of all the data were referenced to the C 1s peak (284.6 eV). All the electrodes after cycling were rinsed in DMC several times to remove any residual salts and dried before characterizations.

### **1.3 Electrochemical measurements**

All cells were assembled in an Ar-purified glovebox ( $\text{H}_2\text{O} < 0.1$  ppm and  $\text{O}_2 < 0.1$  ppm) and subsequently tested using a NEWARE battery testing system. Li|Cu cells utilized Cu and Li as the positive and negative electrodes, respectively. The electrolyte comprised 1 M  $\text{LiPF}_6$  in EC:DEC with 5% FEC (1:1, v/v) and was added in a volume of 60  $\mu\text{L}$ . The PAN/LNO/PP separator was integrated into a 2025 cell, resulting in the Li|Cu cell, hereafter referred to as PAN/LNO/PP. For comparison, Li|Cu cells were also assembled using PP. For Li|Li cell assembly, Li foil served as both the anode and cathode. For full-cell assembly, LFP with an areal loading of 3  $\text{mg cm}^{-2}$ , was chosen as the cathode. The slurry was formulated by blending LFP, acetylene black, and polyvinylidene fluoride (in an 8:1:1 weight ratio) in N-methylpyrrolidone. This mixture was then spread onto carbon-coated aluminum foil and dried at 60  $^\circ\text{C}$  overnight in a vacuum. The cycling and rate tests for the full cells were conducted within a potential range of 2.5-4.0 V.

## 2. Supplementary Figures

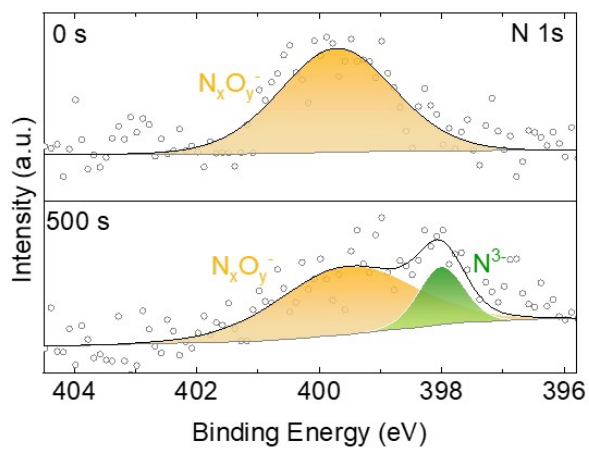

**Figure S1.** N 1s XPS spectra of the cycled Li metal anode with PAN/LNO/PP sputtering for 0 and 500 s.

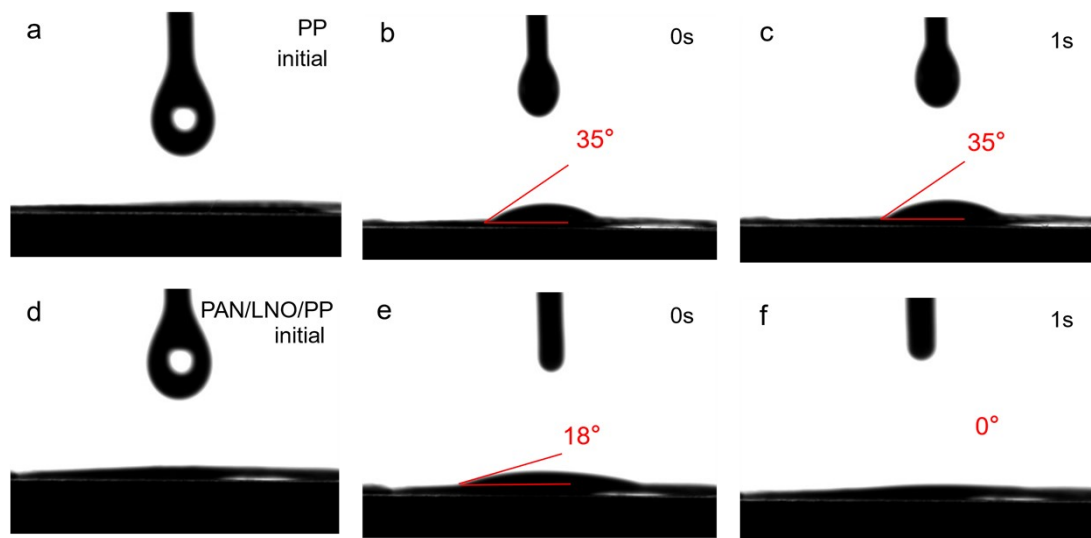

**Figure S2.** Contact angle tests of (a-c) PP and (d-f) PAN/LNO/PP.

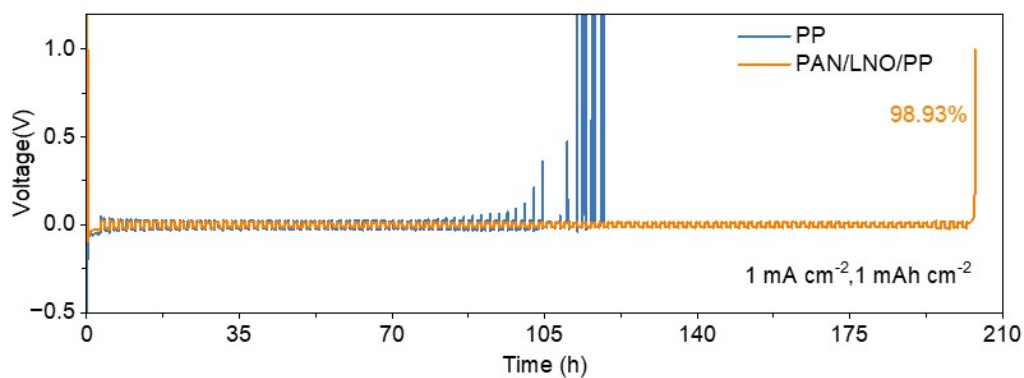

**Figure S3.** Aurbach CE test of Li|Cu cells assembled with PP and PAN/LNO/PP for 100 cycles.

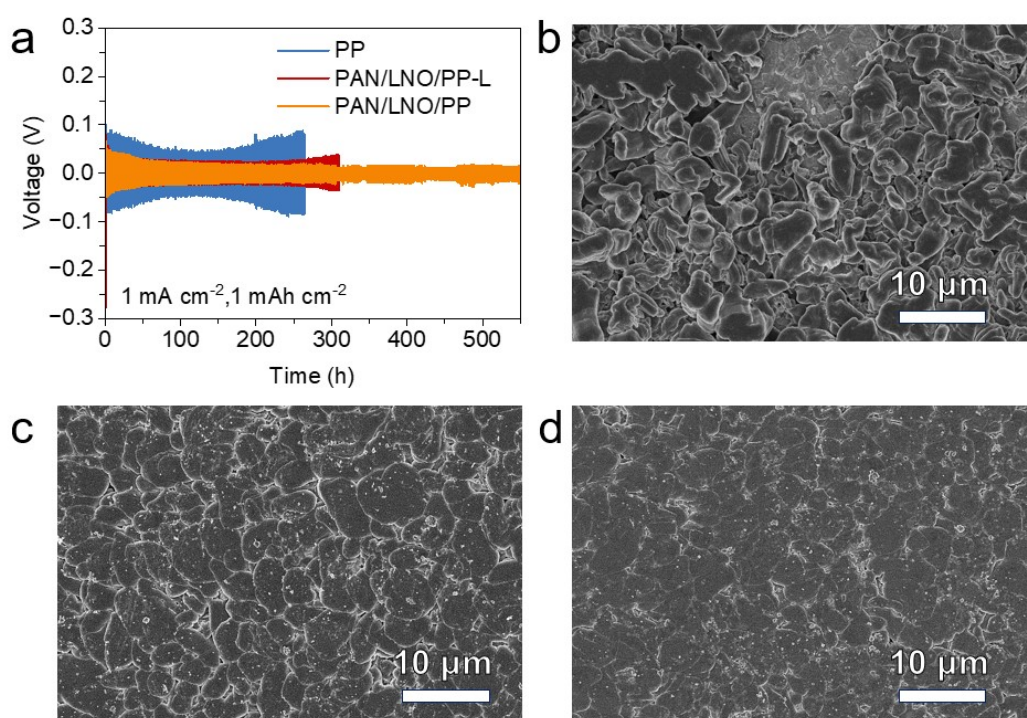

**Figure S4.** (a) Cycling performance of Li|Li symmetrical cells assembled with PP and PAN/LNO/PP-L and PAN/LNO/PP. Morphologies of electrodeposited Li on copper foil (b) without and (c) with PAN/LNO/PP interlayer, and (d) with PAN/LNO/PP-L at  $1 \text{ mA cm}^{-2}$ ,  $3 \text{ mAh cm}^{-2}$ .

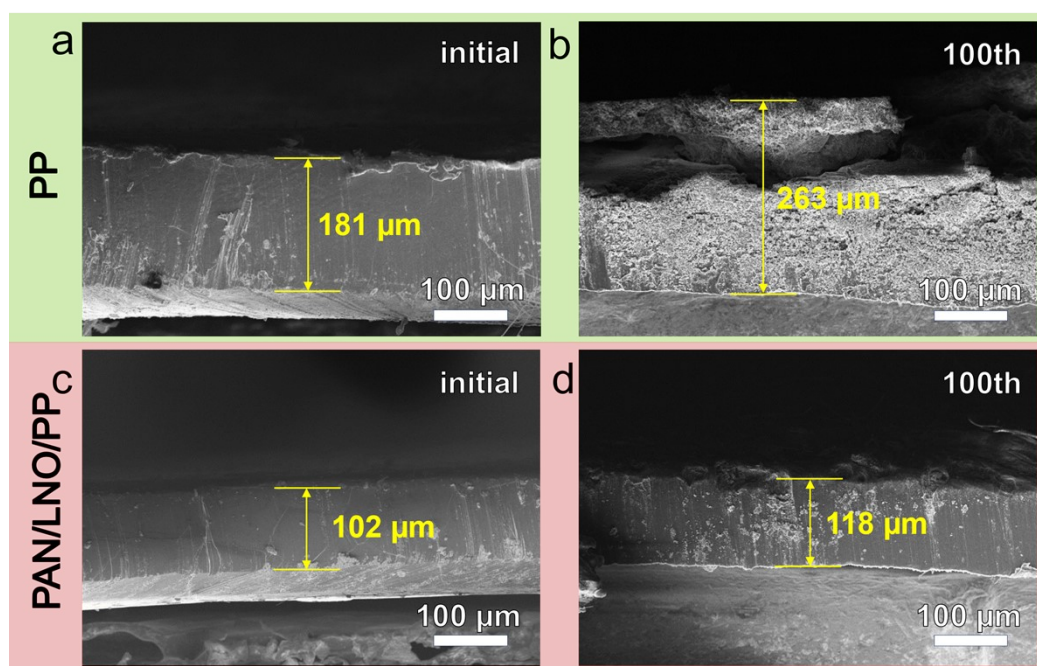

**Figure S5.** Cross-section SEM images of initial (a) PP and (c) PAN/LNO/PP. Cross-section SEM images (b) PP and (d) PAN/LNO/PP after 100 cycles.

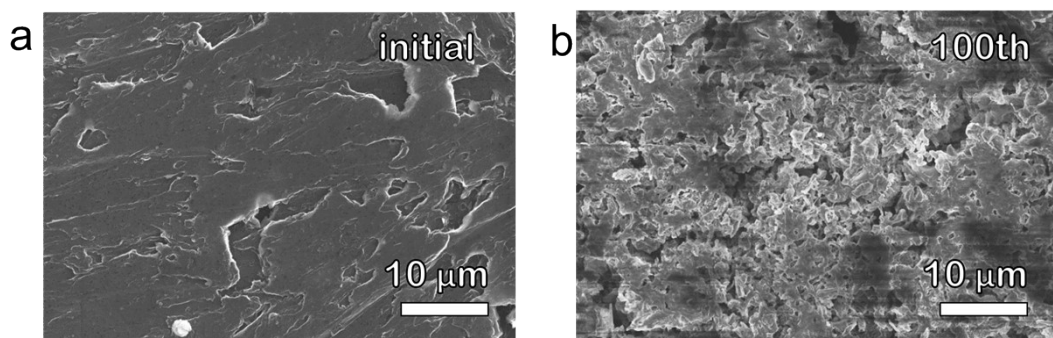

**Figure S6.** SEM of (a) initial Li foil and (b) after 100th cycles assembled with LNO in the electrolyte.
